# Supplementary material for: Rare disease-based scientific annotation knowledge graph
Source: Front Artif Intell. 2022 Aug 11;5:932665. doi: 10.3389/frai.2022.932665 (PMC9403737; doi:10.3389/frai.2022.932665)
Supplement: Supplementary file 2 [file Data_Sheet_2.XLSX]

## Sheet: Results
GARD ID	GARD Name	PubMed ID	PubMed Article Title	Application of Dextromethorphan_manual Review	Cluster
GARD:0007219	Glycine encephalopathy	1385627	Dextromethorphan and high-dose benzoate therapy for nonketotic hyperglycinemia in an infant.	treatment on nonketotic hyperglycinemia	A
GARD:0007219	Glycine encephalopathy	8429455	Dextromethorphan in infantile nonketotic hyperglycinemia.	treatment on nonketotic hyperglycinemia	A
GARD:0007219	Glycine encephalopathy	8110239	Dextromethorphan in nonketotic hyperglycinemia.	treatment on nonketotic hyperglycinemia	A
GARD:0007219	Glycine encephalopathy	21411353	Late-onset nonketotic hyperglycinemia caused by a novel homozygous missense mutation in the GLDC gene.	treatment on nonketotic hyperglycinemia	A
GARD:0007219	Glycine encephalopathy	8437713	Nonketotic hyperglycinemia: clinical and electrophysiologic effects of dextromethorphan, an antagonist of the NMDA receptor.	treatment on nonketotic hyperglycinemia	A
GARD:0007219	Glycine encephalopathy	12149509	Magnetic resonance spectroscopy study of glycine pathways in nonketotic hyperglycinemia.	treatment on nonketotic hyperglycinemia	A
GARD:0007219	Glycine encephalopathy	31230217	The effect of hyperglycinemic treatment in captive-bred Vervet monkeys (Chlorocebus aethiops).	treatment in model system	A
GARD:0007219	Glycine encephalopathy	21316884	Paradoxical increase in seizure frequency with valproate in nonketotic hyperglycinemia.	treatment on nonketotic hyperglycinemia	A
GARD:0007219	Glycine encephalopathy	30385710	Glycine decarboxylase deficiency-induced motor dysfunction in zebrafish is rescued by counterbalancing glycine synaptic level.	treatment in model system	A
GARD:0007219	Glycine encephalopathy	26749113	Neurodevelopmental Outcome and Treatment Efficacy of Benzoate and Dextromethorphan in Siblings with Attenuated Nonketotic Hyperglycinemia.	treatment on nonketotic hyperglycinemia	A
GARD:0007219	Glycine encephalopathy	9580775	Long-term use of high-dose benzoate and dextromethorphan for the treatment of nonketotic hyperglycinemia.	treatment on nonketotic hyperglycinemia	A
GARD:0007219	Glycine encephalopathy	7885541	Failure of early dextromethorphan and sodium benzoate therapy in an infant with nonketotic hyperglycinemia.	treatment on nonketotic hyperglycinemia	A
GARD:0007219	Glycine encephalopathy	15514900	[Clinical progress of neonatal non-ketotic hyperglycinemia under treatment].	treatment on nonketotic hyperglycinemia	A
GARD:0007219	Glycine encephalopathy	15032382	Poor outcome for neonatal-type nonketotic hyperglycinemia treated with high-dose sodium benzoate and dextromethorphan.	treatment on nonketotic hyperglycinemia	A
GARD:0007219	Glycine encephalopathy	24343542	[Amplitude-integrated electroencephalography in non-ketotic hyperglycinaemia].	treatment on nonketotic hyperglycinemia	A
GARD:0007219	Glycine encephalopathy	18182648	High-frequency rhythmic cortical myoclonus in a long-surviving patient with nonketotic hypergylcemia.	treatment on nonketotic hyperglycinemia	A
GARD:0007219	Glycine encephalopathy	8657542	Efficacy of low-dose dextromethorphan in the treatment of nonketotic hyperglycinemia.	treatment on nonketotic hyperglycinemia	B
GARD:0009605	Nystagmus, myoclonic			side effect, improvement, eye contact	C
GARD:0005696	Rett syndrome	28931647	Randomized open-label trial of dextromethorphan in Rett syndrome.	treatment, neurological	B
GARD:0006454	Necrotizing fasciitis	29581121	Dextromethorphan Attenuates NADPH Oxidase-Regulated Glycogen Synthase Kinase 3β and NF-κB Activation and Reduces Nitric Oxide Production in Group A Streptococcal Infection.	treatment, infection
GARD:0012124	Macrophage activation syndrome			treatment, neurological	B
GARD:0003705	Molybdenum cofactor deficiency	8741046	Dextromethorphan in molybdenum cofactor deficiency.	treatment, neurological	B
GARD:0007250	Olivopontocerebellar atrophy	10371649	Effects of dopaminergic agents and of an NMDA receptor antagonist on motor coordination in Lurcher mutant mice.	treatment, model system	A
GARD:0003947	Congenital hyperinsulinism	33193079	Possible New Strategies for the Treatment of Congenital Hyperinsulinism.	treatment, neurological	B
GARD:0006834	Kikuchi disease	32037159	CYP2D6 genotyping analysis and functional characterization of novel allelic variants in a Ni-Vanuatu and Kenyan population by assessing dextromethorphan O-demethylation activity.	treatment, lymph nodes, side effect	C
GARD:0009912	Lennox-Gastaut syndrome	22422635	Pharmacokinetic drug interactions between clobazam and drugs metabolized by cytochrome P450 isoenzymes.	treatment, neurological	B
GARD:0012813	Pustular psoriasis	24139370	Acute generalized exanthematous pustulosis due to dextromethorphan.	side effect	C
GARD:0012819	Generalized pustular psoriasis			side effect	C
GARD:0008676	Weber syndrome	33272325	Treatment of pseudobulbar affect (PBA) in a patient with a history of traumatic brain injury, partial brain resection, and brainstem stroke: a case report.	FALSE connection
GARD:0000011	Alternating hemiplegia of childhood	29610157	Clinical Benefit of NMDA Receptor Antagonists in a Patient With <i>ATP1A2</i> Gene Mutation.	treatment, neurological	B
GARD:0002173	Epilepsy, partial, familial			treatment, neurological	B
GARD:0008322	Diabetic mastopathy	25636304	Rationale and design of a randomized double-blind clinical trial in breast cancer: dextromethorphan in chemotherapy-induced peripheral neuropathy.	FALSE connection
GARD:0007199	Neurotoxicity syndromes	31929386	Dextromethorphan Administration on Day 0 and Day 7 for Secondary Prevention of Methotrexate-induced Neurotoxicity in Childhood Acute Lymphoblastic Leukemia: A Retrospective Case Series.	prevention	B
GARD:0007199	Neurotoxicity syndromes	32710710	Management of methotrexate-induced neurotoxicity with aminophylline plus dextromethorphan in a pediatric patient with pineoblastoma.	treatment, neurological	B
GARD:0009369	Pineoblastoma			treatment of Methotrexate	C
GARD:0012017	Pineal germ cell tumor			treatment of Methotrexate	C
GARD:0008207	Pineocytoma			treatment of Methotrexate	C
GARD:0008490	Ectopia pupillae	29116367	Double-blind comparison of the two hallucinogens psilocybin and dextromethorphan: similarities and differences in subjective experiences.	side effect	C
GARD:0010437	Long QT syndrome 11	16100298	QT and QTc interval with standard and supratherapeutic doses of darifenacin, a muscarinic M3 selective receptor antagonist for the treatment of overactive bladder.	FALSE connection
GARD:0009263	Wallenberg syndrome	22458990	A naturalistic on-off-on trial of dextromethorphan/quinidine for agitation associated with cerebellar injury.	treatment, neurological	B
